# Supplementary material
Source: PubMed Central journal article supplement (PMC3070605)
Supplement: NIHMS270572-supplement-01.pdf [file NIHMS270572-supplement-01.pdf]

**Figure S1**

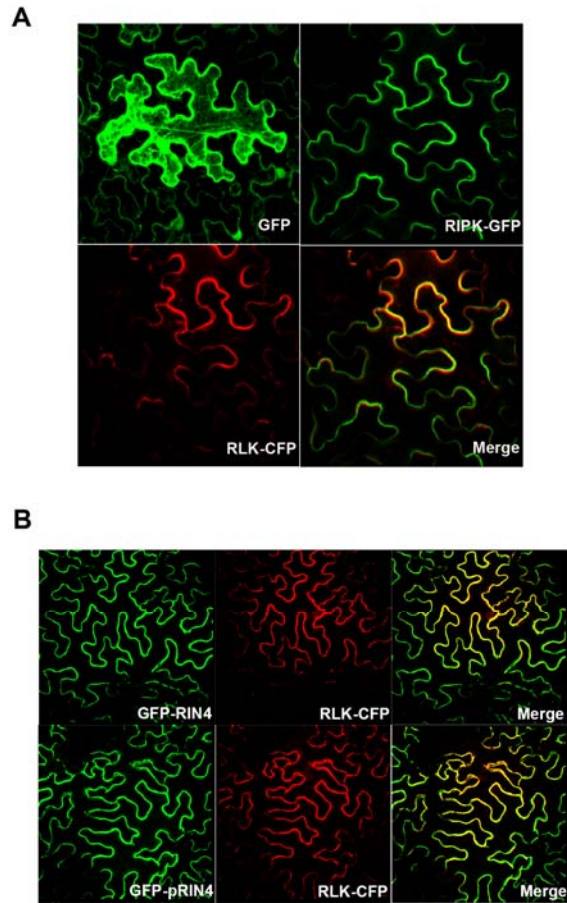

**Figure S1, related to Figure 1: RIPK and RIN4 are plasma-membrane localized.** Confocal laser scanning microscopy of *N. benthamiana* plant leaves transiently expressing GFP, RIPK-GFP (A), GFP-RIN4, GFP-pRIN4 (B) and the plasma membrane localized protein RLK (At4g23740) fused to CFP on its C-terminus. Depending on the flatness of leaf surfaces, the optical sections of Z-stack were performed at range of 10~16 stacks and thicknesses of the image sections were at range of 11~29  $\mu\text{m}$ . The images shown are representative Z-stacks of GFP and CFP fluorescence. CFP was excited at 415nm and the emission channel was assigned as pseudocolor red. GFP-RIN4, GFP-pRIN4, and RIPK-GFP all co-localize with RLK-CFP in the plasma membrane (yellow, merged color). Images were taken 48h post-infiltration.

**Figure S2**

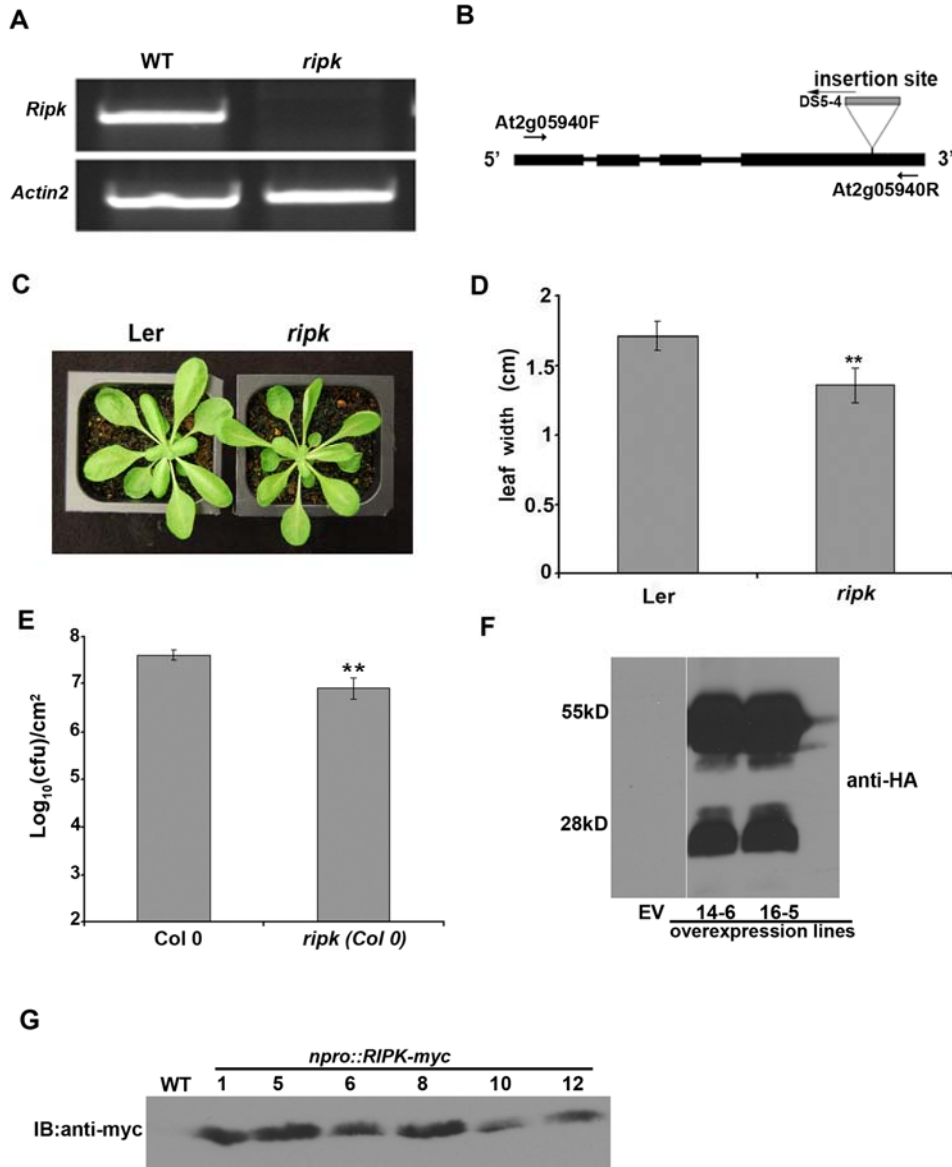

**Figure S2, related to Figure 2: The *ripk* knock out line displays narrower leaves and is more resistant to *Pst* DC3000.** (A) RT-PCR confirms the RIPK gene is no longer expressed in the T-DNA insertion. Actin2 served as a reference gene. (B) Diagram illustrating the RIPK T-DNA insertion site. Primers used in RT-PCR (*At2g05940F/R*) and T-DNA screening (*At2g05940F/DS5-4*) are illustrated. (C) and (D) The *ripk* knockout exhibits narrower leaves than wild-type *Ler*. Error bars represent means  $\pm$  standard deviation,  $n = 16$ . The data shown are representative of two independent experiments with similar results. (E) The *ripk* knockout in a Col 0 background confers enhanced resistance to *Pst* DC3000. Four-week-old plants were spray-inoculated with  $1 \times 10^9$  cfu/ml of *Pst* DC3000. Four days post-inoculation, the plants were subjected to growth curve analysis. Error bars represent means  $\pm$  standard deviation,  $n = 6$ . The data shown are representative of three independent experiments with similar results. Statistical differences for (D) and (E) were detected by a two-tailed t-test,  $\alpha = 0.01$ . (F) Protein expression in 35S::RIPK-HA overexpression transgenic lines from Figure 2. Anti-HA immunoblots illustrate 35S::RIPK-HA overexpression in Col 0. (G) Protein expression in *npro::RIPK-myc* complementation transgenic lines. Anti-myc immunoblots illustrate *npro::RIPK-myc* complementation in *ripk* mutants from Figure 2.

Figure S3

A

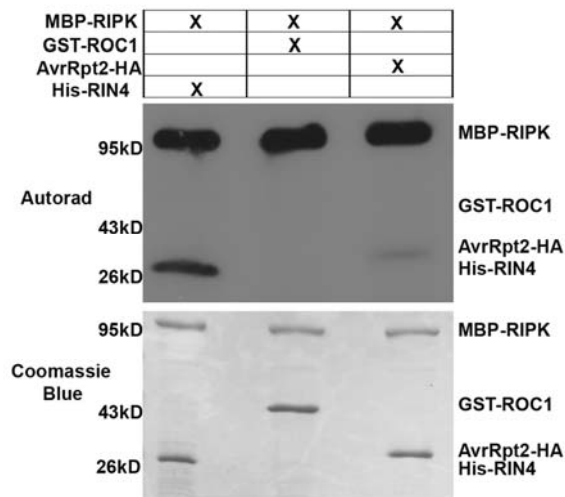

B

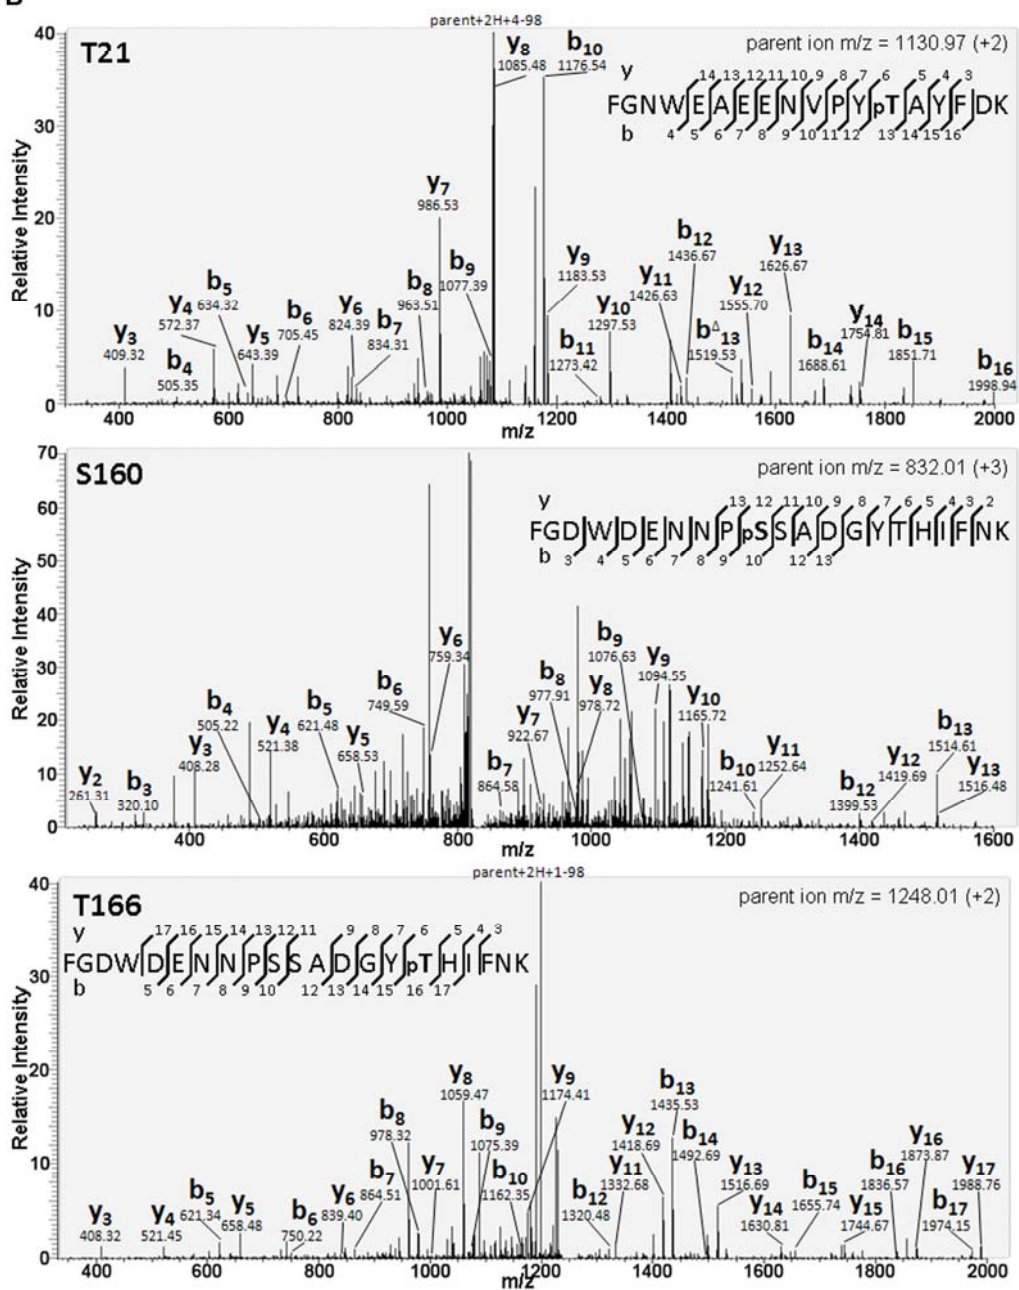

**Figure S3, related to Figure 3: The substrate specificity of RIPK and identification of RIN4 phosphorylation sites by mass spectrometry.** (A) MBP-RIPK cannot efficiently phosphorylate the plant protein cyclophilin ROC1 or the bacterial effector AvrRpt2 *in vitro*. The kinase assay was initiated by adding  $\gamma$ -<sup>32</sup>P-ATP to the reaction mixture and phosphorylated proteins were visualized by autoradiography (upper panel). SDS-PAGE gel stained with coomassie blue illustrates protein input (lower panel). (B) Identification of RIN4 phosphorylation sites. Phosphorylation assays (non-radiolabeled) were performed *in vitro* as described in Figure 3 with His-RIN4 and MBP-RIPK in the kinase reaction mixture. Samples were run on a LTQ-FT mass spectrometer and subjected to tandem mass spectrometry. Purified His-RIN4 was run as a negative control to account for any non-specific RIN4 phosphorylation in *E. coli*. Major identified b- and y- ions are labeled on the graphs.  $\Delta$  represents neutral loss of 98Da ( $H_3PO_4$ ) on indicated peaks. The upper panel shows fragmentation spectrum (ms<sup>2</sup>) of precursor ion 1130.97 m/z identifies phosphopeptide FGNWEAEENVPYpTAYFDK (T21). The middle panel shows fragmentation spectrum (ms<sup>2</sup>) of precursor ion 832.01 m/z identifies phosphopeptide FGDWDENNPpSSADGYTHIFNK (S160). The lower panel shows fragmentation spectrum (ms<sup>2</sup>) of precursor ion 1248.01 m/z identifies phosphopeptide FGDWDENNPSSADGYpTHIFNK (T166).

**Figure S4**

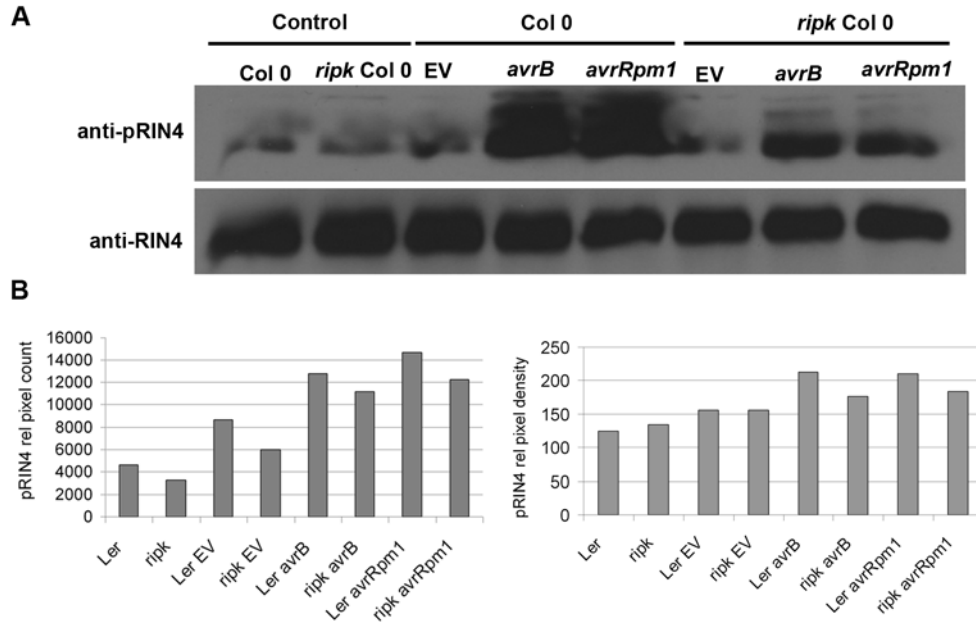

**Figure S4, related to Figure 5: Assessing RIN4 phosphorylation in *ripk* Col 0 and quantifying phosphorylation levels in *ripk* Ler.** (A) Arabidopsis leaves were infiltrated with  $5 \times 10^7$  cfu/ml of *Pst* DC3000 and *Pst* DC3000(*avrB*) or (*avrRpm1*). Immunoblot analysis was performed 6h post-inoculation. Upper panel = phosphorylated RIN4 immunoblot, lower panel = anti-RIN4 immunoblot, control = 0h time point, EV = *Pst* DC3000 control. Anti-RIN4 blot served as a loading control for anti-pRIN4. (B) Quantification of western blot signals from Figure 5C (*ripk* Ler versus Ler). Western blots in Figure 5C were scanned and pixel count (left) as well as band intensity (right) for phosphorylated RIN4 were measured after normalization to the wild-type anti-RIN4 signal.

**Figure S5**

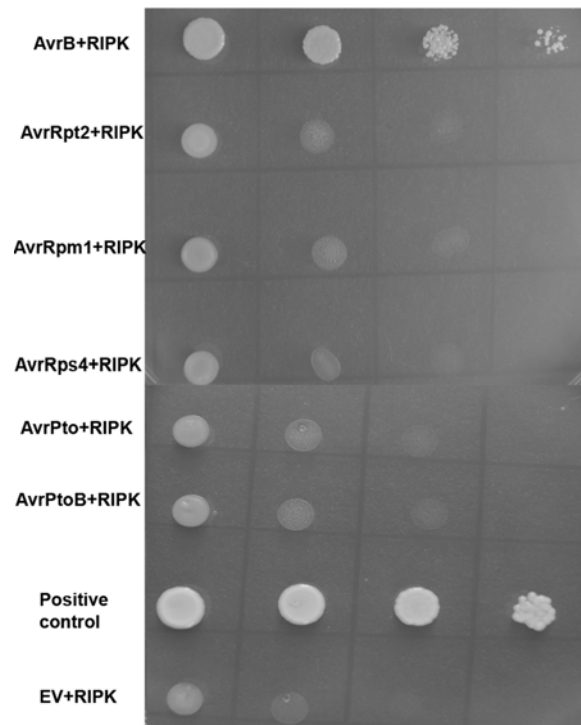

**Figure S5, related to Figure 6: RIPK cannot interact with other bacterial effectors by yeast two-hybrid.** RIPK was expressed from the BD vector and the effector proteins AvrB, AvrRpt2, AvrRpm1, AvrRps4, AvrPto, and AvrPtoB were expressed from the AD vector (Clontech). pGBKT7-53 and pGADT7-T were used as the positive control. RIPK, RIPK + empty AD vector (EV), and RIPK and respective effectors were co-transformed into yeast and subjected to SD/Leu<sup>-</sup>/Trp<sup>-</sup>/His<sup>-</sup> media selection. The transformed yeast was serially diluted and photographed after 3 days of growth.

SUPPLEMENTAL TABLES

Table S1, related to Figure 1: Proteins identified in the pRIN4 complex by mass spectrometry in Dex::AvrRpm1 (Col 0 background). The number of unique peptides identified in each biological replication is listed.

| Identified Proteins (120)                                                               | Accession Number | Dex::AvrRpm1 Col 0 (1) | Dex::AvrRpm1 Col 0 (2) | Dex::AvrRpm1 Col 0 (3) | rpm1/rps2/rin4 (1) | rpm1/rps2/rin4 (2) | rpm1/rps2/rin4 (3) |
|-----------------------------------------------------------------------------------------|------------------|------------------------|------------------------|------------------------|--------------------|--------------------|--------------------|
| RIN4 RPM1-interacting protein 4                                                         | IPI00517440      | 10                     | 9                      | 12                     | 0                  | 0                  | 0                  |
| AT2G05940 Protein kinase (RIPK)                                                         | IPI00547996      | 3                      | 2                      | 0                      | 0                  | 0                  | 0                  |
| FTSH1 Cell division protease ftsH homolog 1, chloroplastic                              | IPI00518805      | 3                      | 3                      | 5                      | 0                  | 0                  | 0                  |
| AT1G20260 V-type proton ATPase subunit B3                                               | IPI00523081      | 3                      | 3                      | 2                      | 0                  | 0                  | 0                  |
| PSBC photosystem II 44 kDa protein                                                      | IPI00527600      | 3                      | 3                      | 3                      | 0                  | 0                  | 0                  |
| AAC1 ADP-ATP carrier protein 1, mitochondrial                                           | IPI00546691      | 3                      | 2                      | 1                      | 0                  | 0                  | 0                  |
| AT3G60750 Transketolase-like protein                                                    | IPI00537782      | 11                     | 8                      | 1                      | 0                  | 0                  | 0                  |
| LHCb5 Chlorophyll a-b binding protein CP26, chloroplastic                               | IPI00535216      | 9                      | 5                      | 6                      | 0                  | 0                  | 0                  |
| AT5G01530 Chlorophyll a-b binding protein CP29.1, chloroplastic                         | IPI00542715      | 3                      | 1                      | 3                      | 0                  | 0                  | 0                  |
| PHS2 Alpha-glucan phosphorylase, H isozyme                                              | IPI00545039      | 2                      | 12                     | 12                     | 1                  | 0                  | 0                  |
| GAPB Glyceraldehyde-3-phosphate dehydrogenase B, chloroplastic                          | IPI00541680      | 12                     | 9                      | 5                      | 3                  | 0                  | 0                  |
| AT3G14420 Probable peroxisomal (S)-2-hydroxy-acid oxidase 2                             | IPI00528534      | 13                     | 10                     | 5                      | 0                  | 0                  | 2                  |
| BGLU18 Beta-glucosidase homolog                                                         | IPI00521974      | 6                      | 1                      | 0                      | 0                  | 0                  | 0                  |
| ATP1 ATP synthase subunit alpha, mitochondrial                                          | IPI00785805      | 4                      | 2                      | 0                      | 0                  | 0                  | 0                  |
| AT3G08530 Clathrin heavy chain                                                          | IPI00544808      | 3                      | 2                      | 0                      | 0                  | 0                  | 0                  |
| AGT Serine-glyoxylate aminotransferase                                                  | IPI00540396      | 3                      | 1                      | 0                      | 0                  | 0                  | 0                  |
| SEC6 SEC6                                                                               | IPI00537390      | 3                      | 0                      | 1                      | 4                  | 0                  | 3                  |
| emb1138 Isoform 2 of DEAD-box ATP-dependent RNA helicase 3                              | IPI00523172      | 3                      | 0                      | 2                      | 1                  | 0                  | 0                  |
| GS2 Glutamine synthetase, chloroplastic/mitochondrial                                   | IPI00534852      | 3                      | 0                      | 3                      | 0                  | 0                  | 0                  |
| AT5G08690 ATP synthase subunit beta-2, mitochondrial                                    | IPI00516234      | 2                      | 1                      | 1                      | 0                  | 0                  | 0                  |
| GRF2 14-3-3-like protein GF14 omega                                                     | IPI00517524      | 2                      | 1                      | 1                      | 0                  | 0                  | 0                  |
| AT2G33800 30S ribosomal protein S5, chloroplastic                                       | IPI00526383      | 2                      | 1                      | 0                      | 0                  | 0                  | 0                  |
| LHCB3 LHCB3 (LIGHT-HARVESTING CHLOROPHYLL B-BINDING PROTEIN 3)                          | IPI00532626      | 1                      | 2                      | 2                      | 0                  | 0                  | 0                  |
| LOS1 Elongation factor EF-2                                                             | IPI00517335      | 1                      | 2                      | 3                      | 0                  | 0                  | 0                  |
| LHCB6 LHCB6 (LIGHT HARVESTING COMPLEX PSII SUBUNIT 6)                                   | IPI00524194      | 1                      | 2                      | 1                      | 0                  | 0                  | 1                  |
| RBCL Ribulose biphosphate carboxylase large chain                                       | IPI00535114      | 43                     | 49                     | 41                     | 36                 | 32                 | 28                 |
| ATMS1 5-methyltetrahydropteroyltriglutamate--homocysteine methyltransferase             | IPI00522440      | 28                     | 20                     | 20                     | 20                 | 12                 | 14                 |
| ATPB ATP synthase subunit beta, chloroplastic                                           | IPI00525776      | 26                     | 35                     | 37                     | 26                 | 25                 | 22                 |
| RCA Isoform Short of Ribulose biphosphate carboxylase/oxygenase activase, chloroplastic | IPI00518163      | 21                     | 20                     | 23                     | 10                 | 10                 | 10                 |
| CPN60B RuBisCO large subunit-binding protein subunit beta, chloroplastic                | IPI00544292      | 19                     | 23                     | 24                     | 19                 | 20                 | 19                 |
| PGK1 PGK1 (PHOSPHOGLYCERATE KINASE 1)                                                   | IPI00535490      | 19                     | 12                     | 15                     | 14                 | 20                 | 15                 |
| ATPA ATP synthase subunit alpha, chloroplastic                                          | IPI00540632      | 18                     | 23                     | 18                     | 16                 | 7                  | 10                 |
| CLPC1 CLPC1                                                                             | IPI00535976      | 18                     | 19                     | 20                     | 23                 | 8                  | 19                 |
| TUB3:TUB2 Tubulin beta-2/beta-3 chain                                                   | IPI00525001      | 18                     | 9                      | 11                     | 7                  | 11                 | 10                 |
| CPN60A RuBisCO large subunit-binding protein subunit alpha, chloroplastic               | IPI00525237      | 15                     | 17                     | 14                     | 19                 | 17                 | 15                 |
| PEX5 PEX5 (PEROXIN 5)                                                                   | IPI00545622      | 14                     | 14                     | 14                     | 9                  | 10                 | 13                 |
| GAPA Glyceraldehyde-3-phosphate dehydrogenase A, chloroplastic                          | IPI00537303      | 14                     | 12                     | 9                      | 5                  | 3                  | 4                  |
| AT5G16810 ATP binding                                                                   | IPI00543277      | 13                     | 20                     | 19                     | 15                 | 21                 | 20                 |
| TUA4:TUA2 Tubulin alpha-2/alpha-4 chain                                                 | IPI00547933      | 10                     | 7                      | 8                      | 2                  | 1                  | 4                  |
| AT1G47550 Exocyst complex component SEC3A                                               | IPI00536614      | 10                     | 4                      | 9                      | 8                  | 1                  | 10                 |
| GAPC2 GAPC2 (GLYCERALDEHYDE-3-PHOSPHATE DEHYDROGENASE C2)                               | IPI00518090      | 9                      | 9                      | 11                     | 5                  | 3                  | 4                  |
| AT2G02400 Cinnamoyl-CoA reductase family                                                | IPI00542037      | 8                      | 8                      | 11                     | 5                  | 7                  | 8                  |
| VHA-A V-type proton ATPase catalytic subunit A                                          | IPI00525922      | 8                      | 7                      | 7                      | 3                  | 2                  | 3                  |
| PTAC16 PTAC16 (PLASTID TRANSCRIPTIONALLY ACTIVE 16)                                     | IPI00542797      | 8                      | 4                      | 6                      | 6                  | 2                  | 3                  |
| PTAC3 PTAC3 (PLASTID TRANSCRIPTIONALLY ACTIVE3)                                         | IPI00533281      | 8                      | 4                      | 2                      | 3                  | 4                  | 2                  |
| SHM1 Serine hydroxymethyltransferase, mitochondrial                                     | IPI00525727      | 8                      | 1                      | 0                      | 1                  | 0                  | 0                  |
| EIF4A1 Eukaryotic initiation factor 4A-1                                                | IPI00530767      | 7                      | 6                      | 6                      | 8                  | 5                  | 7                  |
| ATPC1 ATP synthase gamma chain 1, chloroplastic                                         | IPI00525302      | 7                      | 6                      | 7                      | 1                  | 6                  | 2                  |
| ATRABE1B Elongation factor Tu, chloroplastic                                            | IPI00520474      | 7                      | 3                      | 5                      | 5                  | 2                  | 4                  |
| - Putative alpha-carboxyltransferase                                                    | IPI00527409      | 6                      | 8                      | 9                      | 8                  | 3                  | 11                 |
| MTO2 Threonine synthase 1, chloroplastic                                                | IPI00523359      | 5                      | 5                      | 6                      | 3                  | 0                  | 4                  |
| LHCA3 LHCA3                                                                             | IPI00532189      | 5                      | 5                      | 8                      | 2                  | 3                  | 3                  |
| HSP60 Chaperonin CPN60, mitochondrial                                                   | IPI00533566      | 5                      | 5                      | 3                      | 2                  | 3                  | 3                  |
| CAB2:CAB1:CAB3 Chlorophyll a-b binding protein 165/180, chloroplastic                   | IPI00527705      | 4                      | 3                      | 3                      | 2                  | 2                  | 0                  |
| RPS1 RPS1 (RIBOSOMAL PROTEIN S1)                                                        | IPI00524792      | 4                      | 2                      | 2                      | 1                  | 3                  | 2                  |
| ANNAT4 Annexin D4                                                                       | IPI00524217      | 3                      | 4                      | 7                      | 5                  | 4                  | 4                  |
| CNX5 Adenylyltransferase and sulfurtransferase MOCS3                                    | IPI00524834      | 3                      | 3                      | 2                      | 1                  | 1                  | 2                  |
| HSP81-2 Heat shock protein 81-2                                                         | IPI00537112      | 3                      | 3                      | 1                      | 1                  | 0                  | 0                  |
| EMB2107 EMB2107 (EMBRYO DEFECTIVE 2107)                                                 | IPI00519014      | 2                      | 3                      | 2                      | 5                  | 2                  | 2                  |
| AT3G09200 60S acidic ribosomal protein P0-2                                             | IPI00517961      | 2                      | 2                      | 2                      | 3                  | 2                  | 1                  |
| ATPF ATP synthase subunit b, chloroplastic                                              | IPI00536436      | 2                      | 3                      | 3                      | 0                  | 2                  | 0                  |
| GRF1 14-3-3-like protein GF14 chi                                                       | IPI00533295      | 2                      | 2                      | 5                      | 3                  | 3                  | 1                  |
| IMPA-2 IMPA-2 (IMPORTIN ALPHA ISOFORM 2); binding / protein transporter                 | IPI00534241      | 2                      | 2                      | 2                      | 2                  | 2                  | 1                  |

| Identified Proteins (120)                                                  | Accession Number | Dex::AvrRpm1 Col 0 (1) | Dex::AvrRpm1 Col 0 (2) | Dex::AvrRpm1 Col 0 (3) | rpm1/rps2/rin4 (1) | rpm1/rps2/rin4 (2) | rpm1/rps2/rin4 (3) |
|----------------------------------------------------------------------------|------------------|------------------------|------------------------|------------------------|--------------------|--------------------|--------------------|
| AT5G35430 Binding                                                          | IPI00544788      | 2                      | 1                      | 0                      | 3                  | 0                  | 3                  |
| DPE2 DPE2 (DISPROPORTIONATING ENZYME 2)                                    | IPI00538294      | 2                      | 1                      | 3                      | 2                  | 0                  | 1                  |
| TUB8 Tubulin beta-8 chain                                                  | IPI00539093      | 2                      | 1                      | 1                      | 1                  | 1                  | 1                  |
| TUB4 Tubulin beta-4 chain                                                  | IPI00542050      | 1                      | 3                      | 3                      | 1                  | 2                  | 2                  |
| GRF6 14-3-3-like protein GF14 lambda                                       | IPI00517027      | 1                      | 2                      | 3                      | 1                  | 3                  | 0                  |
| CAT3 AT1G20620 protein                                                     | IPI00542721      | 4                      | 3                      | 3                      | 0                  | 0                  | 2                  |
| AT4G34450 Coatomer subunit gamma                                           | IPI00537691      | 1                      | 1                      | 1                      | 6                  | 1                  | 1                  |
| TUB5 Tubulin beta-5 chain                                                  | IPI00516743      | 3                      | 1                      | 2                      | 2                  | 1                  | 1                  |
| EIF3C Eukaryotic translation initiation factor 3 subunit C                 | IPI00522535      | 1                      | 1                      | 1                      | 2                  | 0                  | 2                  |
| GAPA-2 GAPA-2 (GLYCERALDEHYDE 3-PHOSPHATE DEHYDROGENASE A SUBUNIT 2)       | IPI00544582      | 3                      | 2                      | 2                      | 2                  | 0                  | 0                  |
| CA1 Isoform 3 of Carbonic anhydrase, chloroplastic                         | IPI00518464      | 7                      | 2                      | 4                      | 0                  | 0                  | 0                  |
| AT2G26570 Unknown protein                                                  | IPI00540846      | 7                      | 0                      | 0                      | 2                  | 0                  | 0                  |
| TIC110 TIC110 (TRANSLOCON AT THE INNER ENVELOPE MEMBRANE OF CHLOROPLAST)   | IPI00540685      | 6                      | 9                      | 4                      | 2                  | 0                  | 1                  |
| RPN1A RPN1A (26S PROTEASOME REGULATORY SUBUNIT S2 1A)                      | IPI00529314      | 6                      | 6                      | 0                      | 3                  | 0                  | 0                  |
| ACT7 Actin-7                                                               | IPI00524611      | 5                      | 5                      | 6                      | 3                  | 3                  | 2                  |
| ACT8 Actin-8                                                               | IPI00524040      | 10                     | 11                     | 13                     | 10                 | 9                  | 10                 |
| LOX2 Lipoxygenase 2, chloroplastic                                         | IPI00548522      | 10                     | 9                      | 9                      | 3                  | 0                  | 1                  |
| AT1G71500 Rieske (2Fe-2S) domain-containing protein                        | IPI00537413      | 1                      | 1                      | 4                      | 1                  | 0                  | 0                  |
| LHCA4 Chlorophyll a-b binding protein 4, chloroplastic                     | IPI00523187      | 1                      | 1                      | 3                      | 0                  | 0                  | 0                  |
| PTAC2 Pentatricopeptide repeat-containing protein At1g74850, chloroplastic | IPI00541880      | 1                      | 0                      | 0                      | 2                  | 1                  | 1                  |
| AT4G24830 Argininosuccinate synthase, chloroplastic                        | IPI00527702      | 1                      | 2                      | 1                      | 1                  | 1                  | 2                  |
| AT5G38430 Ribulose bisphosphate carboxylase small chain 1B, chloroplastic  | IPI00521186      | 1                      | 0                      | 2                      | 0                  | 0                  | 0                  |
| HCF136 Photosystem II stability/assembly factor HCF136, chloroplastic      | IPI00539527      | 0                      | 4                      | 3                      | 4                  | 3                  | 4                  |
| ADL1 Isoform 1 of Dynamin-related protein 1A                               | IPI00540791      | 0                      | 4                      | 1                      | 0                  | 1                  | 7                  |
| TUB6 Tubulin beta-6 chain                                                  | IPI00545934      | 0                      | 2                      | 1                      | 2                  | 0                  | 2                  |
| PORB Protochlorophyllide reductase B, chloroplastic                        | IPI00549013      | 0                      | 2                      | 3                      | 1                  | 0                  | 0                  |
| AT4G11380 Beta-adaptin                                                     | IPI00516448      | 0                      | 2                      | 0                      | 1                  | 0                  | 0                  |
| AT3G59780 FUNCTIONS IN: molecular_function unknown                         | IPI00537216      | 0                      | 2                      | 0                      | 0                  | 1                  | 0                  |
| ADL1E Dynamin-related protein 1E                                           | IPI00528678      | 0                      | 2                      | 0                      | 0                  | 0                  | 3                  |
| NSF Vesicle-fusing ATPase                                                  | IPI00527613      | 0                      | 1                      | 1                      | 3                  | 0                  | 0                  |
| AT5G25754:AT5G25757 Unknown protein                                        | IPI00532169      | 0                      | 1                      | 2                      | 2                  | 0                  | 1                  |
| SEC8 Probable exocyst complex component 4                                  | IPI00532589      | 0                      | 1                      | 0                      | 2                  | 0                  | 1                  |
| CAD1 Glutathione gamma-glutamylcysteinyltransferase 1                      | IPI00528107      | 0                      | 0                      | 0                      | 5                  | 0                  | 0                  |
| AT5G02940 LOCATED IN: chloroplast, chloroplast envelope                    | IPI00533711      | 0                      | 0                      | 0                      | 5                  | 0                  | 0                  |
| AT5G18420 Unknown protein                                                  | IPI00525404      | 0                      | 0                      | 0                      | 4                  | 0                  | 1                  |
| NAP1:2 NAP1                                                                | IPI00545696      | 0                      | 0                      | 0                      | 4                  | 0                  | 0                  |
| PDX1.1 Pyridoxal biosynthesis protein PDX1.1                               | IPI00534999      | 0                      | 0                      | 0                      | 3                  | 0                  | 2                  |
| AT4G19006 26S proteasome regulatory subunit                                | IPI00529601      | 0                      | 0                      | 0                      | 2                  | 1                  | 1                  |
| CIP1 CIP1 (COP1-INTERACTIVE PROTEIN 1)                                     | IPI00524345      | 0                      | 0                      | 0                      | 2                  | 0                  | 0                  |
| AT3G11770 Nucleic acid binding                                             | IPI00530218      | 0                      | 0                      | 1                      | 1                  | 2                  | 0                  |
| TOR1 Microtubule-associated protein TORTIFOLIA1                            | IPI00530987      | 0                      | 0                      | 5                      | 1                  | 0                  | 2                  |
| RPN12a RPN12a (Regulatory Particle non-ATPase 12a)                         | IPI00536776      | 0                      | 0                      | 2                      | 0                  | 4                  | 0                  |
| DCP1 mRNA-decapping enzyme-like protein                                    | IPI00517774      | 0                      | 0                      | 3                      | 0                  | 2                  | 4                  |
| TIF3H1 Eukaryotic translation initiation factor 3 subunit H                | IPI00526917      | 0                      | 0                      | 2                      | 0                  | 1                  | 1                  |
| ADT2 Arogenate dehydratase/prephenate dehydratase 2, chloroplastic         | IPI00528286      | 0                      | 0                      | 0                      | 0                  | 1                  | 2                  |
| AT2G35390 Isoform 1 of Ribose-phosphate pyrophosphokinase 1                | IPI00519537      | 0                      | 0                      | 0                      | 0                  | 1                  | 2                  |
| FTSZ2-1 FTSZ2-1                                                            | IPI00539833      | 0                      | 0                      | 2                      | 0                  | 0                  | 1                  |
| ESM1 GDSL esterase/lipase ESM1                                             | IPI00547045      | 3                      | 0                      | 0                      | 0                  | 0                  | 0                  |
| VAR2 Cell division protease ftsH homolog 2, chloroplastic                  | IPI00546467      | 2                      | 0                      | 0                      | 0                  | 0                  | 0                  |
| AOS Allene oxide synthase, chloroplastic                                   | IPI00526231      | 2                      | 0                      | 1                      | 0                  | 0                  | 0                  |
| HSC70-1 Heat shock cognate 70 kDa protein 1                                | IPI00543293      | 2                      | 0                      | 0                      | 0                  | 0                  | 0                  |
| AT3G14415 Probable peroxisomal (S)-2-hydroxy-acid oxidase 1                | IPI00518426      | 2                      | 0                      | 0                      | 0                  | 0                  | 0                  |
| AT1G66840 Protein PLASTID MOVEMENT IMPAIRED 2                              | IPI00523427      | 2                      | 0                      | 0                      | 0                  | 0                  | 0                  |
| PYK10 Beta-glucosidase                                                     | IPI00533497      | 2                      | 0                      | 0                      | 0                  | 0                  | 0                  |
| CRB Uncharacterized protein At1g09340, chloroplastic                       | IPI00548101      | 2                      | 0                      | 0                      | 0                  | 0                  | 0                  |
| emb1473 50S ribosomal protein L13, chloroplastic                           | IPI00520181      | 2                      | 0                      | 0                      | 0                  | 0                  | 0                  |
| AT1G30230 Elongation factor 1-delta 1                                      | IPI00531026      | 2                      | 0                      | 2                      | 3                  | 2                  | 0                  |



**Table S2. Primers used in the experiments.**

|               |                                                    |
|---------------|----------------------------------------------------|
| at2g05940F    | TTGGATCCATGGCGGTGAAGAAGAAAG                        |
| at2g05940R    | TTGTCGACTTAGTACCGTTCCCCACCT                        |
| RIPKPrF       | CACCTAATATTGGAACCGTGAA                             |
| A12g05940MYCR | GTACCGTTCCCCACCTGCCTC                              |
| 2G05940-KINFW | GGGGACAAGTTTGTACAAAAAAGCAGGCTCCATGGCGGTGAAGAAGAA-A |
| 2G05940-KINRV | GGGGACCACTTGTACAAGAAAGCTGGGTCTTAGTACCGTTCCCCACC    |
| At2g05940RHA  | TTGTCGACGTACCGTTCCCCACCTGC                         |
| AtACT2F       | GCCATCCAAGCTCTTCTCTC                               |
| AtACT2R       | GAACCACCGATACAGACACT                               |
| DS3-4         | CCGTCCCGC AAGTTAAATATG                             |
| DS5-4         | TACGATAACGGTCGGTACGG                               |
| PrRin4F       | CACCTTCTGTCTCTATGAGCATCCATTC                       |
| PrRin4R       | TAGCTAAAGAATTGAAGTCTGAAGC                          |
| RIN4NF        | ACGGCGCGCCATGGCACGTTC                              |
| RIN4NR        | GTGGCGCGCCTCATTTTCCTC                              |
| RIPKQF        | ATGAGTTCATGCCTCGTGAA                               |
| RIPKQR        | AGATAACAGGATTTTCAGCTT                              |
| ActinQF       | TGG-TGG-AAG-CAC-AGA-AGT-TG                         |
| ActinQR       | GAT-CCA-TGT-TTG-GCT-CCT-TG                         |

## EXTENDED EXPERIMENTAL PROCEDURES

### Phosphopeptide mapping by mass spectrometry

Phosphorylated RIN4 (20ug) acquired by a non-radiolabeled *in vitro* kinase assay with RIPK were separated by SDS-PAGE and proteins were reduced, alkylated, and digested with trypsin (Shevchenko et al., 1996). Liquid chromatography tandem mass spectrometry (LC-MS/MS) protein identification was performed using a Waters Nano-Acquity UPLC (Milford, MA) coupled to a hybrid linear ion trap Fourier transform ion cyclotron resonance mass spectrometer (LTQ-FT) (Thermo-Fisher, San Jose CA). Tandem mass spectra data were analyzed using Sequest (ThermoFinnigan, San Jose, CA; version SRF v. 3). Phosphopeptide matches were further validated using Modiro (Protagen AG) (Chamrad et al., 2006) and Ascore (Beausoleil et al., 2006). Phosphopeptide matches were manually validated for peak annotations to exclude incorrect assignments.

### Transient Expression in *Nicotiana benthamiana*

*Agrobacterium*-mediated protein transient expression was performed as described previously (Leister et al., 2005). *T7-RIN4* ORFs, *RIPK-HA*, *avrB-FLAG*, and *GFP* and were cloned into the PMD-1 binary vector (Tai et al., 1999). For HR assays, RPM1 was expressed from its native promoter as previously described (Boyes et al., 1998). The genes of interest in their respective binary vectors were transformed into *A. tumefaciens* strain C58C1. The *Agrobacteria* were infiltrated into *N. benthamiana* leaves at an  $OD_{600}=0.4$ . *Agrobacteria* carrying *avrB-FLAG* was infiltrated 24 hours later than all the other genes.

For subcellular localization experiments, *RIN4* and *pRIN4* ORFs were PCR amplified and cloned into the pMDC43 binary vector (Curtis and Grossniklaus, 2003) and fused with an N terminal GFP. *RIPK* was cloned into the pEarleygate 103 vector, with a C-terminal fusion to GFP (Earley et al., 2006). The RLK (At4g23740) fused to CFP has been previously described (Caplan et al., 2009). GFP and CFP fluorescence was observed on a Leica confocal microscope 48 hrs post inoculation. Co-immunoprecipitations were performed as previously described (Krasileva et al., 2010).

### **Quantification of Western Blot Data**

Western blots probed with anti-RIN4 and anti-pRIN4 were scanned and analyzed in Image J (Abramoff et al., 2004). The pixel density and area for phosphorylated RIN4 bands were normalized against wild-type RIN4 to account for differences in RIN4 levels and protein loading.

### **SUPPLEMENTAL REFERENCES**

Abramoff, M.D., Magelhaes, P.J., and Ram, S.J. (2004). Image processing with ImageJ. *Biophotonics Internatl.* 11, 36-42.

Beausoleil, S.A., Villen, J., Gerber, S.A., Rush, J., and Gygi, S.P. (2006). A probability-based approach for high-throughput protein phosphorylation analysis and site localization. *Nat. Biotechnol.* 24, 1285-1292.

Boyes, D.C., Nam, J., and Dangl, J.L. (1998). The *Arabidopsis thaliana* RPM1 disease resistance gene product is a peripheral plasma membrane protein that is degraded coincident with the hypersensitive response. *Proc. Natl. Acad. Sci. USA* 95, 15849-15854.

Caplan, J.L., Zhu, X., Mamillapalli, P., Marathe, R., Anandalakshmi, R., and Dinesh-Kumar, S.P. (2009). Induced ER chaperones regulate a receptor-like kinase to mediate antiviral innate immune response in plants. *Cell Host Microbe* 6, 457-469.

Chamrad, D.C., Korting, G., Schafer, H., Stephan, C., Thiele, H., Apweiler, R., Meyer, H.E., Marcus, K., and Bluggel, M. (2006). Gaining knowledge from previously unexplained spectra-application of the PTM-Explorer software to detect PTM in HUPO BPP MS/MS data. *Proteomics* 6, 5048-5058.

Curtis, M.D., and Grossniklaus, U. (2003). A gateway cloning vector set for high-throughput functional analysis of genes *in planta*. *Plant Physiol.* 133, 462-469.

Earley, K.W., Haag, J.R., Pontes, O., Opper, K., Juehne, T., Song, K., and Pikaard, C.S. (2006). Gateway-compatible vectors for plant functional genomics and proteomics. *Plant J* 45, 616-629.

Krasileva, K.V., Dahlbeck, D., and Staskawicz, B.J. (2010). Activation of an Arabidopsis resistance protein is specified by the *in planta* association of its leucine-rich repeat domain with the cognate oomycete effector. *Plant Cell* 22, 2444-2458.

Leister, R.T., Dahlbeck, D., Day, B., Li, Y., Chesnokova, O., and Staskawicz, B.J. (2005). Molecular genetic evidence for the role of SGT1 in the intramolecular complementation of Bs2 protein activity in *Nicotiana benthamiana*. *Plant Cell* 17, 1268-1278.

Shevchenko, A., Wilm, M., Vorm, O., Jensen, O.N., Podtelejnikov, A.V., Neubauer, G., Shevchenko, A., Mortensen, P., and Mann, M. (1996). A strategy for identifying gel-separated proteins in sequence databases by MS alone. *Biochemical Society Transactions* 24, 893-896.

Tai, T.H., Dahlbeck, D., Clark, E.T., Gajiwala, P., Pasion, R., Whalen, M.C., Stall, R.E., and Staskawicz, B.J. (1999). Expression of the Bs2 pepper gene confers resistance to bacterial spot disease in tomato. *Proc. Natl. Acad. Sci. USA* 96, 14153-14158.
